# Supplementary material
Source: MDPI journal article supplement (https://www.mdpi.com/2073-4441/15/10/1831)
Supplement: s1 [file s1]

## Supplementary Materials

Article

# Fish Beta Diversity Patterns Across Environmental Gradients in 63 European Shallow Lakes: Effects of Turbidity, Nutrient Enrichment, and Exotic Species

Rosemberg Fernandes Menezes <sup>1,2,\*</sup>, Jens-Christian Svenning <sup>3</sup>, Hui Fu <sup>4</sup>, Luc De Meester <sup>5,6,7,8</sup>, Torben Linding Lauridsen <sup>2,9</sup>, Martin Søndergaard <sup>2,9</sup>, José María Conde-Porcuna <sup>10</sup> and Erik Jeppesen <sup>2,9,11,12,13</sup>

<sup>1</sup> Departamento de Fitotecnia e Ciências Ambientais, Centro de Ciências Agrárias, Universidade Federal da Paraíba, Areia 58395-000, Brazil

<sup>2</sup> Department of Ecoscience, Center for Water Technology (WATEC), Aarhus University, DK-6000 Aarhus, Denmark; ms@ecos.au.dk (M.S.); ej@ecos.au.dk (E.J.)

<sup>3</sup> Center for Ecological Dynamics in a Novel Biosphere (ECONOVO) & Center for Biodiversity Dynamics in a Changing World (BIOCHANGE), Department of Biology, Aarhus University, Ny Munkegade 114, DK-8000 Aarhus, Denmark; svenning@bio.au.dk

<sup>4</sup> Department of Ecology, College of Environment & Ecology, Hunan Provincial Key Laboratory of Rural Ecosystem Health in Dongting Lake Area, Hunan Agricultural University, Changsha 410128, China; huifu367@163.com

<sup>5</sup> Freshwater Ecology, Evolution and Biodiversity Conservation, University of Leuven, Debériotstraat 32, 3000 Leuven, Belgium; luc.demeester@igb-berlin.de

<sup>6</sup> Leibniz-Institute of Freshwater Ecology and Inland Fisheries, 12587 Berlin, Germany

<sup>7</sup> Institute of Biology, Freie Universität Berlin, Königin-Luise-Strasse 1-3, 14195, Berlin, Germany

<sup>8</sup> Berlin-Brandenburg Institute of Advanced Biodiversity Research (BBIB), Altensteinstr. 6, 14195 Berlin, Germany

<sup>9</sup> University of Chinese Academy of Sciences, Sino-Danish Centre for Education and Research (SDC), Beijing 100049, China

<sup>10</sup> Institute of Water Research, University of Granada, Ramón y Cajal 4, 18071 Granada, Spain; jmconde@ugr.es

<sup>11</sup> Limnology Laboratory, Department of Biological Sciences, Centre for Ecosystem Research and Implementation, Middle East Technical University, Ankara 06800, Turkey

<sup>12</sup> Institute of Marine Sciences, Middle East Technical University, Mersin 33731, Turkey

<sup>13</sup> Institute for Ecological Research and Pollution Control of Plateau Lakes, School of Ecology and Environmental Science, Yunnan University, Kunming 650091, China

\* Correspondence: rosembergmenezes@gmail.com; Tel.: +55-83-3362-1726

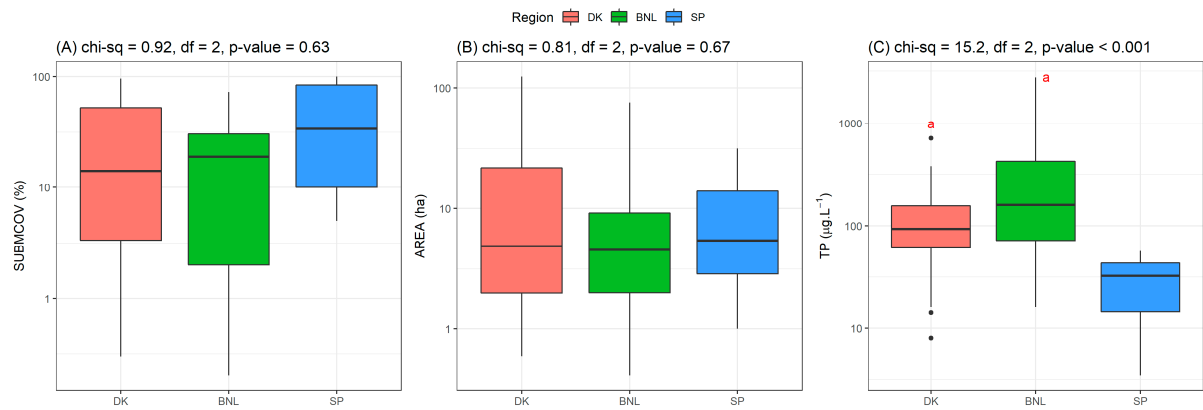

**Figure S1.** Kruskal-Wallis tests comparing the means among regions for submerged macrophyte coverage (SUBMCOV %), lakes size (AREA), and total phosphorus (TP). The box and whisker plots show the median and range of each environmental gradient. Similar letters at the top of the bar graphs indicate that the medians of the groups compared are similar according to the Dunn's test of multiple comparisons.

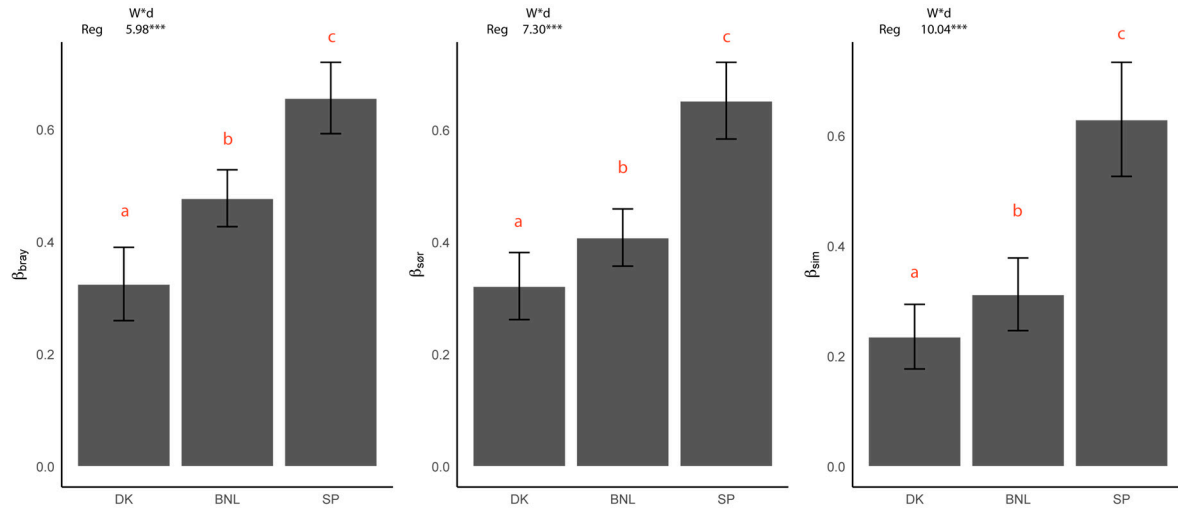

**Figure S2.** Results of  $W^*_d$ -test to assess the effect of geographical region (DK = Denmark, BNL = Belgium and The Netherlands, SP = Spain) on fish beta diversity ( $\beta_{\text{bray}}$  and  $\beta_{\text{sor}}$ ) and turnover ( $\beta_{\text{sim}}$ ). A pairwise comparison among regions was also performed. The error bars denote the confidence intervals and different letters indicate significant differences, based on pairwise comparisons using the function *Tw2.posthoc.tests* in Hamadi et al. (2019). Average distances to centroids were used to estimate fish  $\beta$ -diversity along a latitudinal gradient from northern Europe to southern Spain. The asterisks in the  $W^*_d$  values refer to the permutation test significance level (\* $p < 0.05$ ; \*\* $p < 0.01$ ; \*\*\* $p < 0.001$ ; n.s = non-significant).

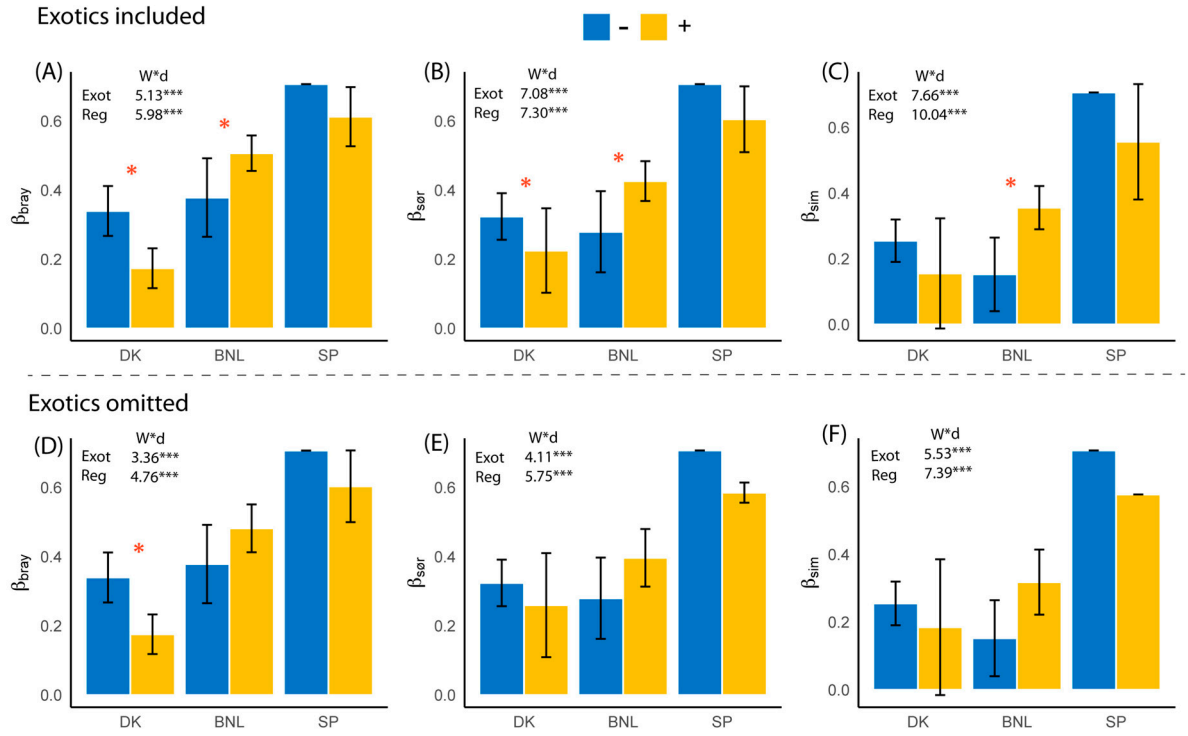

**Figure S3.** Results of  $W^*_d$ -test to elucidate the effect of presence of exotic (Exot) fish species (+ vs. - exotics) and region (Reg) on fish beta diversity ( $\beta_{\text{bray}}$  and  $\beta_{\text{sor}}$ ) and turnover ( $\beta_{\text{sim}}$ ). A pairwise comparison among the groups was also performed. Average distances to centroids were used to estimate fish  $\beta$ -diversity along a latitudinal gradient from northern Europe to southern Spain (DK = Denmark, BNL = Belgium and The Netherlands, SP = Spain). Beta diversity and turnover were calculated for lakes with presence (+) and absence (-) of exotic fish species. The effects of exotics fish were also tested including and omitting exotics species from the data sets. The error bars denote the confidence intervals and the red asterisks above the bars show that beta diversity ( $\beta_{\text{bray}}$ ,  $\beta_{\text{sor}}$  and  $\beta_{\text{sim}}$ ) is different between lakes with and without exotics within the corresponding group region.

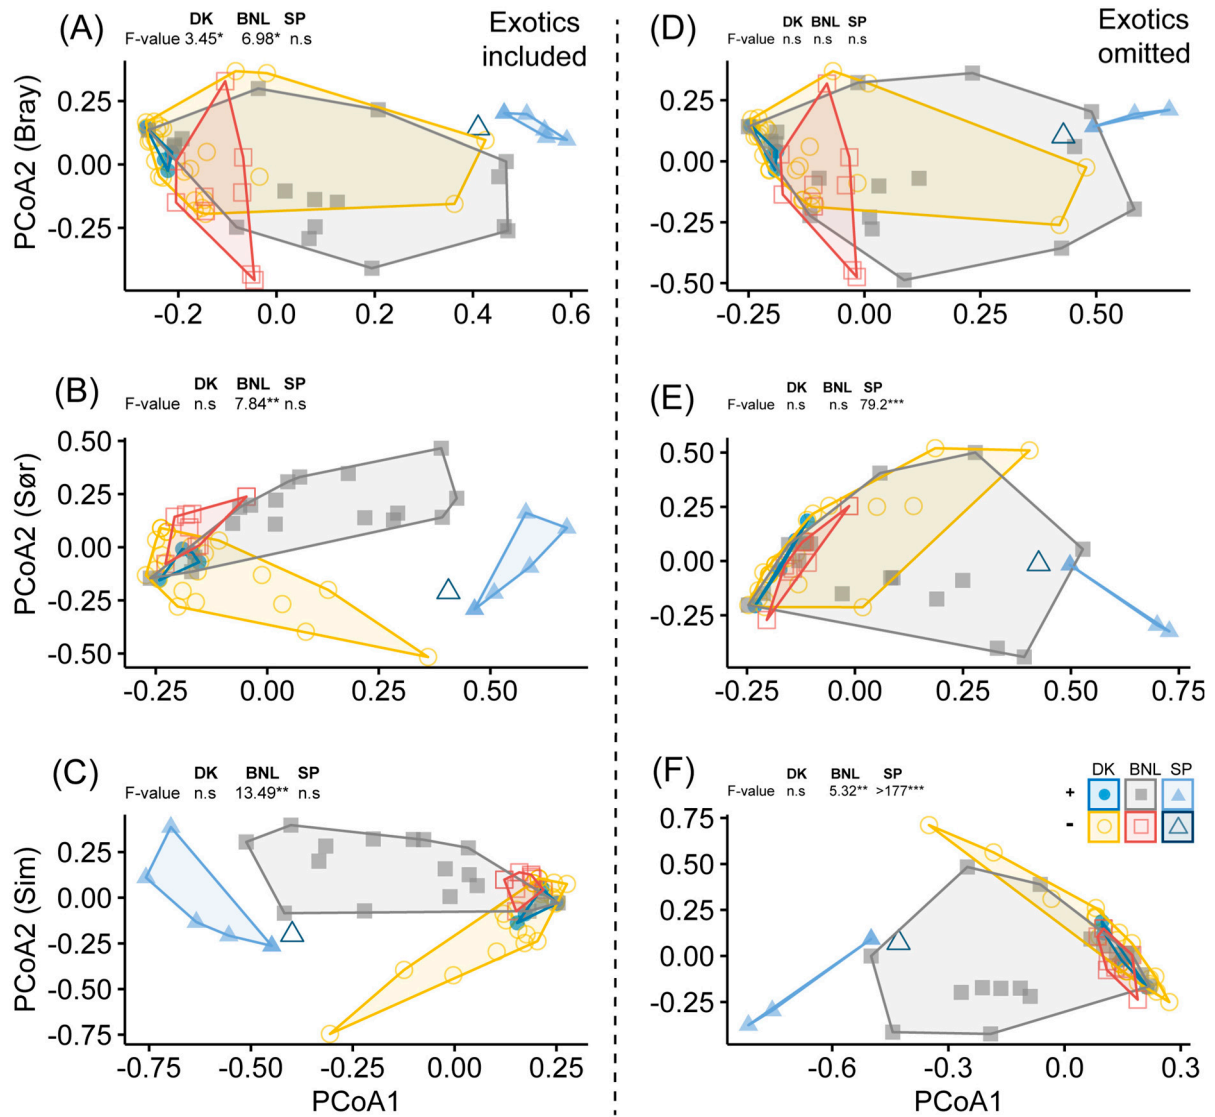

**Figure S4.** Results of principal coordinate (PCoA) and PERMDISP analyses assessing the effects of presence of exotic fish on group dispersion (variances) within each region (DK = Denmark, BNL = Belgium and The Netherlands, SP = Spain). To test if the dispersions between groups within region differed, the distances of group members to the group centroid were subject to ANOVA analysis. The multivariate dispersions were computed using Bray-Curtis (A-D), Sørensen (B-E), and Simpson (C-F) dissimilarity indices for lakes with (+) and without (-) exotic fish species. The effects of exotics fish were also tested including and omitting exotics species from the data sets. The asterisks in the F-values refer to the permutation test significance level (\* $p < 0.05$ ; \*\* $p < 0.01$ ; \*\*\* $p < 0.001$ ; n.s = non-significant).

**Table S1.** Environmental variables and environmental heterogeneity components (EH) used as predictors in the general dissimilarity models (GDMs). The climate variables used for  $EH_{\text{clim}}$  were averages for the years 1970-2000 and were obtained from *WorldClim* [44].

| Environmental heterogeneity components              | Environmental variables                                                                                                                                                                                                                                                                                                                                                                                                                                                                                                                                                                                                                                                                                                                                                                                 |
|-----------------------------------------------------|---------------------------------------------------------------------------------------------------------------------------------------------------------------------------------------------------------------------------------------------------------------------------------------------------------------------------------------------------------------------------------------------------------------------------------------------------------------------------------------------------------------------------------------------------------------------------------------------------------------------------------------------------------------------------------------------------------------------------------------------------------------------------------------------------------|
| Geographic distance (GD)                            | Latitude and longitude coordinates                                                                                                                                                                                                                                                                                                                                                                                                                                                                                                                                                                                                                                                                                                                                                                      |
| Water quality characteristics ( $EH_{\text{lim}}$ ) | Water temperature ( $^{\circ}\text{C}$ ), conductivity ( $\mu\text{S cm}^{-1}$ ), pH, Secchi depth (m), total suspended matter ( $\text{mg L}^{-1}$ ), suspended matter inorganic fraction ( $\text{mg L}^{-1}$ ), total nitrogen ( $\text{mg L}^{-1}$ ) and phosphorus ( $\mu\text{g L}^{-1}$ ), silicate ( $\text{mg L}^{-1}$ ), and orthophosphate ( $\mu\text{g L}^{-1}$ )                                                                                                                                                                                                                                                                                                                                                                                                                          |
| Physical variables ( $EH_{\text{phy}}$ )            | Lake surface area (ha) and lake depth (m)                                                                                                                                                                                                                                                                                                                                                                                                                                                                                                                                                                                                                                                                                                                                                               |
| Biological resources ( $EH_{\text{res}}$ )          | Chlorophyll a ( $\mu\text{g L}^{-1}$ ), the biomasses of cyanobacteria ( $\mu\text{gC L}^{-1}$ ), cryptophytes ( $\mu\text{gC L}^{-1}$ ), chlorococcales ( $\mu\text{gC.L}^{-1}$ ), phytoplankton < 20 $\mu\text{m}$ , 20-40 $\mu\text{m}$ and > 40 $\mu\text{m}$ ( $\mu\text{gC L}^{-1}$ ), total phytoplankton ( $\mu\text{gC L}^{-1}$ ), mixotrophic species ( $\mu\text{gC L}^{-1}$ ), rotifers ( $\mu\text{g L}^{-1}$ ), cladocerans ( $\mu\text{g L}^{-1}$ ), cyclopoids ( $\mu\text{g L}^{-1}$ ), calanoids ( $\mu\text{g L}^{-1}$ ), oligotrichs, grazable and total ciliates (% in total biomass), densities of bacterial and heterotrophic nanoflagelates (cells $\text{mL}^{-1}$ ), % coverage of submerged, floating, and emergent macrophytes, and % infestation of submerged macrophytes. |
| Climatic variables ( $EH_{\text{clim}}$ )           | Annual mean temperature ( $^{\circ}\text{C}$ ), temperature seasonality (standard deviation $\times 100$ ), annual precipitation (mm), and precipitation seasonality (coefficient of variation).                                                                                                                                                                                                                                                                                                                                                                                                                                                                                                                                                                                                        |

**Table S2.** Product-moment correlation coefficients ( $r$ ) and associated  $P$  values between gradient variables in each of the three regions.

| Region | $N$ | SUBMCOV - TP |      | SUBMCOV - AREA |      | TP - AREA |      |
|--------|-----|--------------|------|----------------|------|-----------|------|
|        |     | $r$          | $P$  | $R$            | $P$  | $r$       | $P$  |
| DK     | 29  | -0.33        | 0.08 | 0.10           | 0.60 | -0.16     | 0.40 |
| BNL    | 26  | -0.18        | 0.37 | 0.05           | 0.80 | -0.06     | 0.77 |
| SP     | 8   | -0.60        | 0.12 | -0.29          | 0.49 | 0.26      | 0.54 |

*Note:* SUBMCOV: submerged macrophyte coverage; TP: total phosphorus; AREA: lake size; DK: Denmark; BNL: Belgium/The Netherlands; SP: Spain.

**Table S3.** Summary statistics of gradient variables for each of the studied geographic regions.

For the analyses, we used data from 63 shallow lakes sampled from northern Europe to southern Spain (Denmark = 29; Belgium/The Netherlands = 26; Spain = 8).

| Variable               | Region | Min   | 1 <sup>st</sup> Quart | Median | Mean   | 3 <sup>rd</sup> Quart | Max     | SD     |
|------------------------|--------|-------|-----------------------|--------|--------|-----------------------|---------|--------|
| SUBMCOV (%)            | DK     | 0.00  | 0.00                  | 4.00   | 21.74  | 34.00                 | 96.00   | 32.20  |
|                        | BNL    | 0.00  | 0.00                  | 1.20   | 12.53  | 25.50                 | 73.00   | 18.42  |
|                        | SP     | 0.00  | 0.00                  | 7.50   | 29.12  | 46.50                 | 100.00  | 40.62  |
| Area (ha)              | DK     | 0.60  | 2.00                  | 4.90   | 19.60  | 21.80                 | 124.00  | 30.12  |
|                        | BNL    | 0.41  | 2.01                  | 4.56   | 11.72  | 9.22                  | 76.25   | 19.07  |
|                        | SP     | 1.00  | 2.88                  | 6.10   | 11.09  | 15.10                 | 31.60   | 11.83  |
| TP ( $\mu\text{g/L}$ ) | DK     | 8.00  | 61.00                 | 93.00  | 131.80 | 155.00                | 708.00  | 135.92 |
|                        | BNL    | 15.97 | 72.79                 | 158.27 | 388.63 | 422.05                | 2752.92 | 685.56 |
|                        | SP     | 3.46  | 14.29                 | 32.62  | 30.19  | 43.47                 | 56.66   | 18.51  |

*Note:* SUBMCOV: submerged macrophyte coverage; TP: total phosphorus; AREA: lake size; Min.: minimum record; Max: maximum record; 1<sup>st</sup> Quart: 1<sup>st</sup> Quartile; 3<sup>rd</sup> Quart.: 3<sup>rd</sup> Quartile; SD: standard deviation; DK: Denmark; BNL: Belgium/The Netherlands; SP: Spain.

**Table S4.** Number of lakes in the five dichotomous categories of environmental effects: water turbidity (clear or turbid), total phosphorus (low and high), lake surface area (small and large), connectivity (connected and isolated), and lakes with and without exotic fish species.

| <b>Gradients</b>        | <b>DK</b> | <b>BNL</b> | <b>SP</b> |
|-------------------------|-----------|------------|-----------|
| <i>Turbidity</i>        |           |            |           |
| Clear                   | 15        | 13         | 5         |
| Turbid                  | 14        | 13         | 3         |
| <i>Total phosphorus</i> |           |            |           |
| Low                     | 16        | 9          | 8         |
| High                    | 13        | 17         | 0         |
| <i>Lake size</i>        |           |            |           |
| Small                   | 15        | 14         | 4         |
| Large                   | 14        | 12         | 4         |
| <i>Connectivity</i>     |           |            |           |
| Connected               | 14        | 14         | 4         |
| Isolated                | 15        | 12         | 4         |
| <i>Exotic fish</i>      |           |            |           |
| Without                 | 25        | 9          | 2         |
| With                    | 4         | 17         | 6         |

*Notes:* DK: Denmark; BNL: Belgium/The Netherlands; SP: Spain.



**Table S5.** Lakes names, lake codes, lake regions, coordinates (decimals) and categories of environmental effects: water turbidity (clear or turbid), total phosphorus (low and high), lake surface area (small and large), connectivity (connected and isolated), and lakes with and without exotic fish species

| Lake Names        | Lake Codes | Lake Regions | Lake Connectivity | Turbidity Classes | Total P Classes | Lake Size Classes | Exotic fish Classes | Lat (N) | Lon (W) |
|-------------------|------------|--------------|-------------------|-------------------|-----------------|-------------------|---------------------|---------|---------|
| Avn soe           | AVNS       | DK           | Connected         | Turbid            | Low             | Small             | With                | 56.142  | 9.575   |
| Doej soe          | DOJS       | DK           | Connected         | Clear             | Low             | Small             | With                | 56.029  | 9.907   |
| Dystrup soe       | DYST       | DK           | Connected         | Clear             | Low             | Large             | Without             | 56.451  | 10.628  |
| Egeholt soe       | EGEH       | DK           | Isolated          | Turbid            | High            | Small             | Without             | 56.111  | 9.531   |
| Elle soe          | ELLE       | DK           | Isolated          | Turbid            | Low             | Large             | With                | 56.130  | 9.574   |
| Engetved soe      | ENGE       | DK           | Isolated          | Clear             | Low             | Small             | Without             | 56.058  | 9.556   |
| Ensoe             | ENSO       | DK           | Connected         | Clear             | Low             | Large             | With                | 55.940  | 9.299   |
| Gammellose        | GLMO       | DK           | Isolated          | Clear             | High            | Small             | With                | 56.151  | 9.889   |
| Hinge soe         | HING       | DK           | Connected         | Turbid            | High            | Large             | Without             | 56.256  | 9.490   |
| Hulsoe            | HULS       | DK           | Connected         | Clear             | Low             | Small             | Without             | 56.058  | 9.622   |
| Kvind soe         | KVIN       | DK           | Connected         | Turbid            | High            | Large             | Without             | 56.025  | 9.498   |
| Lading soe        | LADI       | DK           | Isolated          | Clear             | High            | Large             | Without             | 56.216  | 9.963   |
| Nedersoe          | NEDE       | DK           | Connected         | Turbid            | High            | Large             | Without             | 55.931  | 9.333   |
| Poet soe          | POET       | DK           | Connected         | Turbid            | High            | Small             | Without             | 56.156  | 9.524   |
| Ring soe          | RING       | DK           | Isolated          | Clear             | High            | Large             | Without             | 55.965  | 9.595   |
| Schousbye soe     | SCHO       | DK           | Isolated          | Clear             | Low             | Small             | With                | 56.168  | 9.617   |
| Silkeborg Langsoe | SILK       | DK           | Connected         | Turbid            | Low             | Large             | With                | 56.166  | 9.519   |
| Soelvsten damme   | SLST       | DK           | Isolated          | Turbid            | High            | Small             | With                | 56.274  | 9.937   |
| Soeby soe         | SOBY       | DK           | Isolated          | Clear             | Low             | Large             | Without             | 56.049  | 9.069   |
| Sorte soe         | SORT       | DK           | Connected         | Clear             | High            | Small             | With                | 56.035  | 9.914   |
| Soebygaard soe    | SOSO       | DK           | Isolated          | Turbid            | High            | Large             | With                | 56.256  | 9.807   |
| Sunds soe         | SUND       | DK           | Isolated          | Clear             | Low             | Large             | Without             | 56.214  | 9.021   |
| Torring (soe v.)  | TORR       | DK           | Connected         | Clear             | High            | Small             | Without             | 55.848  | 9.510   |

|                           |      |     |           |        |      |       |         |        |        |
|---------------------------|------|-----|-----------|--------|------|-------|---------|--------|--------|
| Tranevig                  | TRAN | DK  | Isolated  | Clear  | Low  | Small | Without | 56.146 | 9.513  |
| Vallum soe                | VALL | DK  | Isolated  | Turbid | Low  | Large | Without | 56.384 | 10.530 |
| Vaeng soe                 | VANG | DK  | Isolated  | Turbid | High | Large | Without | 56.035 | 9.653  |
| Vestermose                | VSMO | DK  | Connected | Turbid | Low  | Small | Without | 56.034 | 9.887  |
| Ny Vissing soe            | NYVI | DK  | Connected | Turbid | Low  | Small | Without | 56.047 | 9.693  |
| Gub soe                   | GUBS | DK  | Isolated  | Clear  | Low  | Small | With    | 56.202 | 9.529  |
| Berlare Broek             | BB   | BNL | Connected | Turbid | Low  | Large | Without | 51.035 | 4.005  |
| Blokkersdijk              | BD   | BNL | Isolated  | Clear  | High | Large | With    | 51.233 | 4.347  |
| Blankaartvijver           | BLV  | BNL | Connected | Turbid | High | Large | Without | 51.072 | 4.461  |
| Breeven                   | BV   | BNL | Isolated  | Turbid | High | Large | With    | 51.091 | 4.239  |
| Fort Oelegem              | FO   | BNL | Isolated  | Turbid | Low  | Small | Without | 51.227 | 4.614  |
| Gavers                    | GAV  | BNL | Isolated  | Clear  | Low  | Large | Without | 50.844 | 3.324  |
| Goor                      | GOOR | BNL | Connected | Turbid | High | Small | With    | 51.061 | 4.706  |
| Kleiputten                | KP   | BNL | Isolated  | Clear  | High | Small | Without | 50.919 | 3.138  |
| Maten 12                  | M12  | BNL | Connected | Turbid | High | Small | With    | 50.944 | 5.441  |
| Maten 13                  | M13  | BNL | Connected | Clear  | Low  | Small | With    | 50.941 | 5.436  |
| Nieuwkoopse Plassen       | NKPL | BNL | Connected | Clear  | Low  | Large | With    | 52.153 | 4.798  |
| Oud Heverlee Helder       | OHH  | BNL | Connected | Clear  | High | Large | With    | 50.845 | 4.661  |
| Oud Heverlee Troebel      | OHT  | BNL | Connected | Turbid | High | Large | With    | 50.829 | 4.639  |
| Oude Meren 4              | OM4  | BNL | Connected | Turbid | High | Small | With    | 51.148 | 5.015  |
| Oude Maasmeander Maasveld | OMMV | BNL | Isolated  | Clear  | High | Large | With    | 51.033 | 5.420  |
| Plas Astrid               | PA   | BNL | Isolated  | Turbid | High | Small | With    | 51.182 | 3.216  |
| Platweyers                | PW   | BNL | Connected | Clear  | High | Large | With    | 50.969 | 5.341  |
| Schulensmeer              | SM   | BNL | Isolated  | Turbid | High | Large | With    | 50.959 | 5.144  |
| Uitbergen                 | UITB | BNL | Isolated  | Turbid | High | Small | Without | 51.035 | 3.975  |
| Vinderhoutte              | VB   | BNL | Isolated  | Clear  | Low  | Small | With    | 51.088 | 3.622  |
| Voortmangelbeek           | VM   | BNL | Isolated  | Clear  | High | Large | With    | 51.068 | 4.383  |
| Vloethenveld 11           | VV11 | BNL | Connected | Clear  | Low  | Small | Without | 51.147 | 3.099  |
| Vloethenveld 12           | VV12 | BNL | Connected | Clear  | Low  | Small | Without | 51.148 | 3.097  |

|                  |      |     |           |        |      |       |         |        |        |
|------------------|------|-----|-----------|--------|------|-------|---------|--------|--------|
| Wik 1            | WIK1 | BNL | Connected | Turbid | High | Small | With    | 51.221 | 2.926  |
| Wik2             | WIK2 | BNL | Connected | Clear  | High | Small | With    | 51.220 | 2.921  |
| Zavelput         | ZP   | BNL | Isolated  | Turbid | Low  | Small | With    | 51.053 | 3.808  |
| Archidona-chica  | ARCH | SP  | Isolated  | Clear  | Low  | Small | With    | 37.109 | -4.303 |
| Archidona-grande | ARGR | SP  | Isolated  | Clear  | Low  | Small | Without | 37.098 | -4.309 |
| Morenilla        | MOR  | SP  | Isolated  | Turbid | Low  | Large | With    | 38.985 | -2.900 |
| Tinaja           | TIN  | SP  | Connected | Clear  | Low  | Large | With    | 38.933 | -2.839 |
| Zoñar-chica      | ZOCH | SP  | Connected | Turbid | Low  | Small | With    | 37.483 | -4.691 |
| Zoñar-grande     | ZOGR | SP  | Isolated  | Turbid | Low  | Large | With    | 37.355 | -4.684 |
| Nueva            | NUE  | SP  | Connected | Clear  | Low  | Large | Without | 36.752 | -2.950 |
| Padul-1          | PA1  | SP  | Connected | Clear  | Low  | Small | With    | 37.015 | -3.603 |

---

**Table S6.** Fish occurrence in the different regions and number of lakes in which species appear in the Danish (DK), Belgian/Dutch (BNL), and Spanish lakes (SP). Exotic species refers to non-native fish species either within the study's region (SP, BNL and DK) or Europe. The asterisks after the specific epithet denote exotic species. The literature sources for exotics fish species is given below the table.

| Species name                | Family        | DK<br>Lakes | BNL<br>Lakes | SP<br>Lakes | Species<br>frequency | Exotic<br>to<br>Europe | Exotic<br>to the<br>region | Often used for<br>stocking<br>(now/historically) | Small<br>range<br>endemics | Literature sources |
|-----------------------------|---------------|-------------|--------------|-------------|----------------------|------------------------|----------------------------|--------------------------------------------------|----------------------------|--------------------|
| <i>Ameiurus nebulosus</i> * | Ictaluridae   | -           | 6            | -           | 6                    | Yes                    | Yes                        | Yes                                              | No                         | [106]              |
| <i>Alburnus alburnus</i>    | Cyprinidae    | 2           | -            | -           | 2                    | No                     | No                         | No                                               | No                         |                    |
| <i>Blicca bjoerkna</i>      | Cyprinidae    | -           | 5            | -           | 5                    | No                     | No                         | No                                               | No                         |                    |
| <i>Abramis brama</i>        | Cyprinidae    | 17          | 11           | -           | 28                   | No                     | No                         | No                                               | No                         |                    |
| <i>Carassius carassius</i>  | Cyprinidae    | 8           | 3            | -           | 11                   | No                     | No                         | Yes                                              | No                         |                    |
| <i>Carassius gibelio</i> *  | Cyprinidae    | -           | 7            | -           | 7                    | Yes                    | Yes                        | Yes                                              | No                         | [107]              |
| <i>Cyprinus carpio</i> *    | Cyprinidae    | -           | 8            | 2           | 10                   | Yes                    | Yes                        | Yes                                              | No                         | [108]              |
| <i>Coregonus lavaretus</i>  | Coregonidae   | 2           | -            | -           | 2                    | No                     | No                         | No                                               | No                         |                    |
| <i>Gobio gobio</i>          | Cyprinidae    | 3           | 5            | -           | 8                    | No                     | No                         | No                                               | No                         |                    |
| <i>Umbra pygmaea</i> *      | Umbridae      | -           | 2            | -           | 2                    | Yes                    | Yes                        | No                                               | No                         | [105]              |
| <i>Lepomis gibbosus</i> *   | Centrarchidae | -           | 8            | 2           | 10                   | Yes                    | Yes                        | Yes                                              | No                         | [107]              |

|                                        |            |    |    |   |    |     |     |     |     |           |
|----------------------------------------|------------|----|----|---|----|-----|-----|-----|-----|-----------|
| <i>Leucaspius deliniatus</i> *         | Cyprinidae | -  | 1  | - | 1  | No  | Yes | No  | No  | [108]     |
| <i>Leuciscus idus</i>                  | Cyprinidae | -  | 3  | - | 3  | No  | No  | No  | No  |           |
| <i>Osmerus eperlanus</i>               | Osmeridae  | 1  | -  | - | 1  | No  | No  | No  | No  |           |
| <i>Esox lucius</i>                     | Esocidae   | 16 | 5  | - | 21 | No  | No  | Yes | No  |           |
| <i>Perca fluviatilis</i>               | Percidae   | 26 | 19 | - | 45 | No  | No  | Yes | No  |           |
| <i>Pseudorasbora parva</i> *           | Cyprinidae | -  | 6  | - | 6  | Yes | Yes | Yes | No  | [107]     |
| <i>Rhodeus sericeus<br/>amarus</i>     | Cyprinidae | -  | 5  | - | 5  | No  | No  | No  | No  |           |
| <i>Rutilus rutilus</i>                 | Cyprinidae | 25 | 20 | - | 45 | No  | No  | No  | No  |           |
| <i>Scardinius<br/>erythrophthalmus</i> | Cyprinidae | 15 | 20 | - | 35 | No  | No  | No  | No  |           |
| <i>Gymnocephalus<br/>cernua</i>        | Percidae   | 12 | 7  | - | 19 | No  | No  | No  | No  |           |
| <i>Tinca tinca</i>                     | Cyprinidae | 9  | 2  | - | 11 | No  | No  | Yes | No  |           |
| <i>Sander lucioperca</i> *             | Percidae   | 4  | 4  | - | 8  | No  | Yes | Yes | No  | [103,108] |
| <i>Barbus sp.</i>                      | Cyprinidae | -  | -  | 1 | 1  | No  | No  | No  | Yes |           |
| <i>Micropterus<br/>salmoides</i> *     | Cyprinidae | -  | -  | 2 | 2  | Yes | Yes | Yes | No  | [105]     |
| <i>Phoxinellus hispanicus</i>          | Cyprinidae | -  | -  | 2 | 2  | No  | No  | No  | Yes |           |
| <i>Leuciscus sp.</i>                   | Cyprinidae | -  | -  | 1 | 1  | No  | No  | No  | No  |           |

|                                                                              |                     |     |     |     |   |     |     |     |     |       |
|------------------------------------------------------------------------------|---------------------|-----|-----|-----|---|-----|-----|-----|-----|-------|
| <i>Atherina sp.</i>                                                          | Atherinidae         | -   | -   | 1   | 1 | No  | No  | No  | Yes |       |
| <i>Aphanius iberus</i>                                                       | Cyprinodonti<br>dae | -   | -   | 1   | 1 | No  | No  | No  | Yes |       |
| <i>Carassius auratus</i> *                                                   | Cyprinidae          | -   | -   | 2   | 2 | Yes | Yes | Yes | No  | [105] |
| <i>Scardinius sp.*</i>                                                       | Cyprindae           | -   | -   | 3   | 3 | No  | Yes | No  | No  | [104] |
| <b>Exotic to Europe</b>                                                      | -                   | 1   | 7   | 4   | - | 9   | -   | -   | -   |       |
| <b>Exotic to the region</b>                                                  | -                   | 1   | 9   | 5   | - | -   | 12  | -   | -   |       |
| <b>Used for stocking</b>                                                     | -                   | 5   | 10  | 4   | - | -   | -   | 12  | -   |       |
| <b>Small range<br/>endemics</b>                                              | -                   | 0   | 1   | 4   | - | -   | -   | -   | 4   |       |
| <b>Endemic species</b>                                                       | -                   | 11  | 11  | 5   | - | -   | -   | -   | -   |       |
| <b>Total number of<br/>species</b>                                           | -                   | 13  | 20  | 10  | - | -   | -   | -   | -   |       |
| <b>Mean species<br/>number per lake</b>                                      | -                   | 4.8 | 5.7 | 2.1 | - | -   | -   | -   | -   |       |
| <b>Total number of<br/>species ever<br/>recorded (source:<br/>Fish Base)</b> | -                   | 65  | 70  | 101 | - | -   | -   | -   | -   |       |

**Table S7.** Permutation test for homogeneity of multivariate dispersions (PERMDISP) and W\*d analyses assessing the effects of turbidity, total phosphorus, lake size, lake connectivity, and presence of exotic fish on group dispersion and on group location between environmental categories within each region (DK = Denmark, BNL = Belgium and The Netherlands, SP = Spain). To test if the dispersions between environmental groups within region differed (e.g. DK clear x DK turbid lakes), the distances of group members to the group centroid were subject to ANOVA analysis, whereas W\*d analyses were performed to test differences in location between environmental groups. The multivariate dispersions were computed using Bray-Curtis, Sørensen, and Simpson dissimilarity indices for clear and turbid (> or < 20% of the lake surface area covered by macrophytes), low and high nutrient-enriched (> or < 100 µg l<sup>-1</sup> TP), large and small lakes (lake surface > or < 5 ha), connected and isolated lakes, and for lakes with (+) and without (-) exotic fish species. The permutation test was also performed after removing (AR) exotics species from the data.

| Covariate                             | Region | PERMDISP              |      |         |             | W*d test |             |
|---------------------------------------|--------|-----------------------|------|---------|-------------|----------|-------------|
|                                       |        | Dissimilarity indices | SS   | F-ratio | p values    | W*d      | p values    |
| Turbidity (clear vs. turbid)          | DK     | Bray-Curtis           | 0.15 | 6.73    | <b>0.01</b> | 3.97     | <b>0.00</b> |
|                                       | DK     | Sørensen              | 0.04 | 1.61    | 0.22        | 3.21     | <b>0.03</b> |
|                                       | DK     | Simpson               | 0.05 | 2.25    | 0.14        | 5.36     | <b>0.03</b> |
| TP (low vs. high)                     | DK     | Bray-Curtis           | 0.00 | 0.01    | 0.94        | 0.56     | 0.74        |
|                                       | DK     | Sørensen              | 0.01 | 0.28    | 0.60        | 0.50     | 0.70        |
|                                       | DK     | Simpson               | 0.00 | 0.07    | 0.79        | 0.59     | 0.54        |
| Lake Size (small vs. large)           | DK     | Bray-Curtis           | 0.15 | 6.67    | <b>0.01</b> | 4.12     | <b>0.00</b> |
|                                       | DK     | Sørensen              | 0.02 | 0.69    | 0.42        | 2.88     | <b>0.05</b> |
|                                       | DK     | Simpson               | 0.10 | 4.55    | <b>0.04</b> | 4.34     | <b>0.05</b> |
| Connectivity (connected vs. isolated) | DK     | Bray-Curtis           | 0.16 | 7.81    | <b>0.01</b> | 1.50     | 0.22        |
|                                       | DK     | Sørensen              | 0.20 | 13.75   | <b>0.00</b> | 2.73     | <b>0.05</b> |
|                                       | DK     | Simpson               | 0.12 | 4.95    | <b>0.03</b> | 2.79     | 0.13        |

|                                       |     |             |      |       |             |       |             |
|---------------------------------------|-----|-------------|------|-------|-------------|-------|-------------|
| Exotics (+ vs. -)                     | DK  | Bray-Curtis | 0.09 | 3.46  | 0.06        | 3.98  | <b>0.01</b> |
|                                       | DK  | Sørensen    | 0.03 | 1.38  | 0.25        | 4.27  | <b>0.03</b> |
|                                       | DK  | Simpson     | 0.03 | 1.49  | 0.22        | 0.02  | NA          |
| Exotics (+ vs. -) (AR)                | DK  | Bray-Curtis | 0.09 | 3.40  | 0.08        | 3.45  | <b>0.03</b> |
|                                       | DK  | Sørensen    | 0.01 | 0.58  | 0.45        | 1.27  | 0.37        |
|                                       | DK  | Simpson     | 0.02 | 0.72  | 0.40        | -0.84 | NA          |
| Turbidity (clear vs. turbid)          | BNL | Bray-Curtis | 0.10 | 8.24  | <b>0.01</b> | 1.42  | 0.21        |
|                                       | BNL | Sørensen    | 0.10 | 8.12  | <b>0.01</b> | 2.80  | <b>0.02</b> |
|                                       | BNL | Simpson     | 0.06 | 2.74  | 0.10        | 2.50  | 0.10        |
| TP (low vs. high)                     | BNL | Bray-Curtis | 0.00 | 0.28  | 0.61        | 0.56  | 0.80        |
|                                       | BNL | Sørensen    | 0.00 | 0.06  | 0.80        | 0.33  | 0.85        |
|                                       | BNL | Simpson     | 0.01 | 0.24  | 0.63        | -0.27 | 0.92        |
| Lake Size (small vs. large)           | BNL | Bray-Curtis | 0.07 | 4.60  | <b>0.04</b> | 3.00  | <b>0.01</b> |
|                                       | BNL | Sørensen    | 0.04 | 2.54  | 0.12        | 2.66  | <b>0.03</b> |
|                                       | BNL | Simpson     | 0.11 | 3.45  | 0.07        | 4.23  | <b>0.01</b> |
| Connectivity (connected vs. isolated) | BNL | Bray-Curtis | 0.01 | 0.38  | 0.55        | 0.93  | 0.48        |
|                                       | BNL | Sørensen    | 0.00 | 0.05  | 0.82        | 0.82  | 0.54        |
|                                       | BNL | Simpson     | 0.02 | 0.73  | 0.40        | 1.02  | 0.44        |
| Exotics (+ vs. -)                     | BNL | Bray-Curtis | 0.10 | 6.98  | <b>0.02</b> | 2.66  | <b>0.01</b> |
|                                       | BNL | Sørensen    | 0.13 | 7.84  | <b>0.01</b> | 5.16  | <b>0.00</b> |
|                                       | BNL | Simpson     | 0.24 | 13.49 | <b>0.00</b> | 6.77  | <b>0.00</b> |
| Exotics (+ vs. -) (AR)                | BNL | Bray-Curtis | 0.06 | 3.25  | 0.08        | 2.66  | <b>0.01</b> |



|                                       |     |             |      |                       |                     |      |             |
|---------------------------------------|-----|-------------|------|-----------------------|---------------------|------|-------------|
|                                       | BNL | Sørensen    | 0.08 | 3.19                  | 0.09                | 5.16 | <b>0.00</b> |
|                                       | BNL | Simpson     | 0.16 | 5.32                  | <b>0.03</b>         | 6.77 | <b>0.00</b> |
| Turbidity (clear vs. turbid)          | SP  | Bray-Curtis | 0.03 | 1.35                  | 0.27                | 1.46 | 0.21        |
|                                       | SP  | Sørensen    | 0.03 | 1.08                  | 0.33                | 1.55 | 0.14        |
|                                       | SP  | Simpson     | 0.01 | 0.19                  | 0.68                | 1.70 | NA          |
| TP (low vs. high)                     | SP  | Bray-Curtis | -    | -                     | -                   | -    | -           |
|                                       | SP  | Sørensen    | -    | -                     | -                   | -    | -           |
|                                       | SP  | Simpson     | -    | -                     | -                   | -    | -           |
| Lake Size (small vs. large)           | SP  | Bray-Curtis | 0.01 | 0.90                  | 0.17                | 0.50 | 0.89        |
|                                       | SP  | Sørensen    | 0.01 | 0.96                  | 0.17                | 0.56 | 0.83        |
|                                       | SP  | Simpson     | 0.01 | 0.98                  | 0.18                | 0.27 | 1.00        |
| Connectivity (connected vs. isolated) | SP  | Bray-Curtis | 0.00 | 0.86                  | 0.17                | 0.39 | 1.00        |
|                                       | SP  | Sørensen    | 0.00 | 0.86                  | 0.17                | 0.34 | 1.00        |
|                                       | SP  | Simpson     | 0.01 | 0.98                  | 0.17                | 0.27 | 1.00        |
| Exotics (+ vs. -)                     | SP  | Bray-Curtis | 0.01 | 2.40                  | 0.21                | 1.38 | 0.21        |
|                                       | SP  | Sørensen    | 0.02 | 2.25                  | 0.22                | 1.41 | NA          |
|                                       | SP  | Simpson     | 0.03 | 1.45                  | 0.25                | 1.55 | NA          |
| Exotics (+ vs. -) (AR)                | SP  | Bray-Curtis | 0.01 | 4.48                  | 0.10                | 1.39 | 0.20        |
|                                       | SP  | Sørensen    | 0.02 | 79.25                 | <b>0.00</b>         | 1.47 | NA          |
|                                       | SP  | Simpson     | 0.02 | 1.77x10 <sup>29</sup> | <b>&lt; 0.00001</b> | 1.50 | NA          |

---
